# Supplementary material for: Birth weight is associated with brain tissue volumes seven decades later, but not with age-associated changes to brain structure
Source: bioRxiv or medRxiv preprint supplement (doi:10.1101/2020.08.27.270033), 2020-08-28
Supplement: Supplementary file [file media-1.pdf]

Supplementary Information for

Birth weight is associated with brain tissue volumes seven decades later, but not with age-associated changes to brain structure

Emily Wheeler<sup>1</sup>, Susie Shenkin<sup>2,4</sup>, Susana Muñoz Maniega<sup>3,4</sup>, Maria Valdés Hernández<sup>3,4</sup>, Joanna M. Wardlaw<sup>3,4</sup>, Ian J. Deary<sup>4,5,6</sup>, Mark E. Bastin<sup>3,4,6</sup>, James P. Boardman<sup>1,3</sup>, Simon R. Cox<sup>4,5,6</sup>.

\* Simon R. Cox

**Email:** [simon.cox@ed.ac.uk](mailto:simon.cox@ed.ac.uk)

**This PDF file includes:**

Tables S1 to S4

Figure S1

**Table S1.** Associations between birth weight and the ratio of global brain volumetric MRI measures as a proportion of intracranial volume, correcting for age and sex

|          | $\beta$ | $p$   |
|----------|---------|-------|
| TB/icv   | 0.006   | 0.937 |
| GM/icv   | -0.074  | 0.379 |
| NAWM/icv | 0.149   | 0.080 |
| WMH/icv  | -0.094  | 0.273 |

*Note.* Standardised regression coefficients between birth weight and volumetric MRI measures expressed as a ratio with ICV. Bold typeface denotes FDR  $q < 0.05$ . TB: total brain volume; GM: grey matter volume; NAWM: normal appearing white matter volume; WMH: white matter hyperintensity volume.

**Table S2.** Associations between birth weight and volumetric MRI measures correcting for age, sex, cardiovascular risk factors and cardiovascular disease history.

|      | $\beta$      | $p$              |
|------|--------------|------------------|
| TB   | <b>0.245</b> | <b>0.002</b>     |
| GM   | <b>0.182</b> | <b>0.019</b>     |
| NAWM | <b>0.268</b> | <b>&lt;0.001</b> |
| WMH  | -0.035       | 0.701            |
| gFA  | -0.053       | 0.547            |
| PSMD | -0.016       | 0.850            |

*Note.* Standardised regression coefficients between birth weight and volumetric/white matter microstructure MRI measures. Bold typeface denotes FDR  $q < 0.05$ . TB: total brain volume; GM: grey matter volume; NAWM: normal appearing white matter volume; WMH: white matter hyperintensity volume; gFA: general factor of fractional anisotropy; PSMD: peak width skeletonised mean diffusivity.

**Table S3.** Associations between birth weight and volumetric MRI measures correcting for age, sex, cardiovascular risk factors and cardiovascular disease and stroke history.

|      | $\beta$      | $p$          |
|------|--------------|--------------|
| TB   | <b>0.233</b> | <b>0.004</b> |
| GM   | 0.172        | 0.031        |
| NAWM | <b>0.262</b> | <b>0.001</b> |
| WMH  | -0.049       | 0.598        |
| gFA  | -0.060       | 0.503        |
| PSMD | 0.010        | 0.910        |

*Note.* Standardised regression coefficients between birth weight and volumetric/white matter microstructure MRI measures. Bold typeface denotes FDR  $q < 0.05$ . TB: total brain volume; GM: grey matter volume; NAWM: normal appearing white matter volume; WMH: white matter hyperintensity volume; gFA: general factor of fractional anisotropy; PSMD: peak width skeletonised mean diffusivity.

**Table S4.** Tract loadings on general factor of fractional anisotropy

| Tract    | Standardised loadings. |
|----------|------------------------|
| Splenium | 0.425                  |
| Genu     | 0.624                  |
| LArc     | 0.613                  |
| RArc     | 0.606                  |
| LATR     | 0.600                  |
| RATR     | 0.585                  |
| LCing    | 0.520                  |
| RCing    | 0.530                  |
| LUnc     | 0.634                  |
| RUnc     | 0.661                  |
| LILF     | 0.437                  |
| RILF     | 0.416                  |

*Note.* the genu and splenium of the corpus callosum, LArc – Left arcuate, RArc – right arcuate, LATR – left anterior thalamic radiation, RATR – right anterior thalamic radiation, LCing – Left cingulum bundle, RCing – Right cingulum bundle, LUnc – left uncinate, RUnc – right uncinate, LILF – left inferior longitudinal fasciculus, RILF – right inferior longitudinal fasciculus.

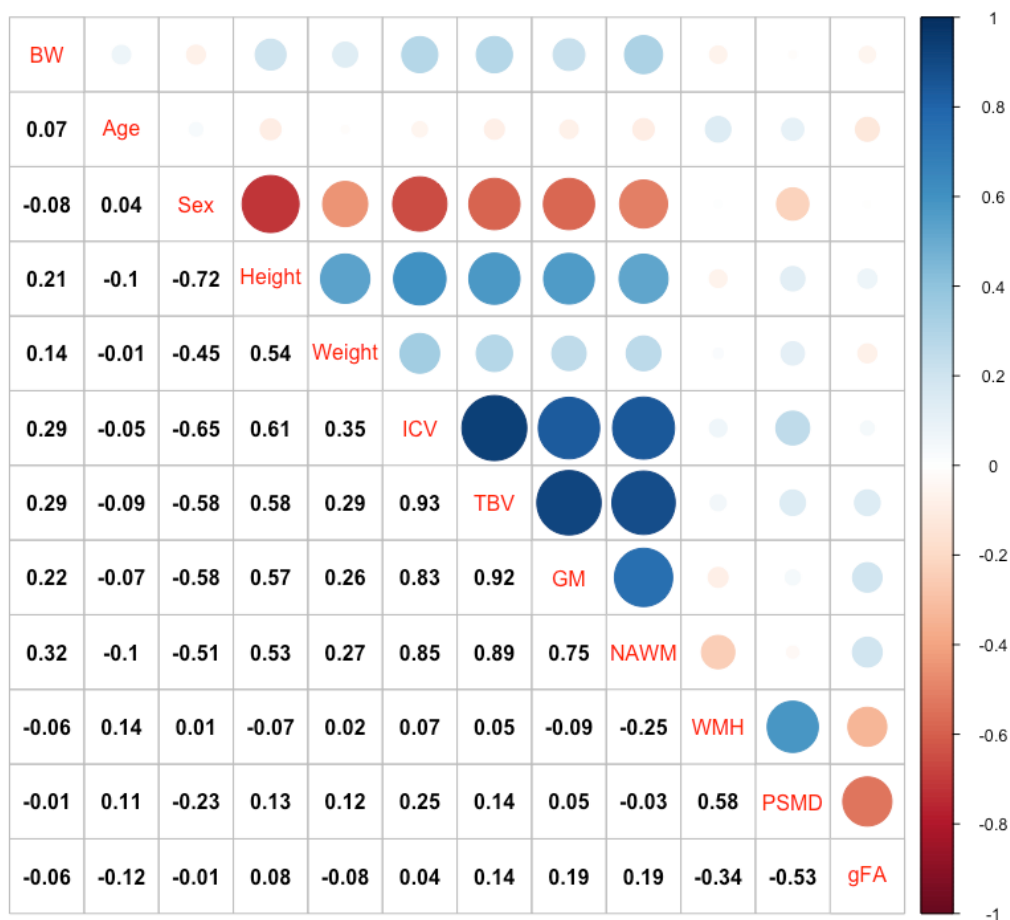

**Figure S1.** Correlation matrix showing Pearson's r correlations between brain MRI features and birth weight, age at MRI, sex, height and weight.

Note BW: birth weight; ICV: intracranial volume; TBV: total brain volume; GM: grey matter volume; NAWM: normal appearing white matter; WMH: white matter hyperintensity volume; PSMD: peak width skeletonized mean diffusivity; gFA: general factor of fractional anisotropy.
